# Supplementary material for: Insights into the Genital Microbiota of Women Who Experienced Fetal Death in Utero
Source: MDPI journal article supplement (doi:10.3390/microorganisms11081877), 2023-07-25
Supplement: s1 [file s1]

## Supplementary Material Figures

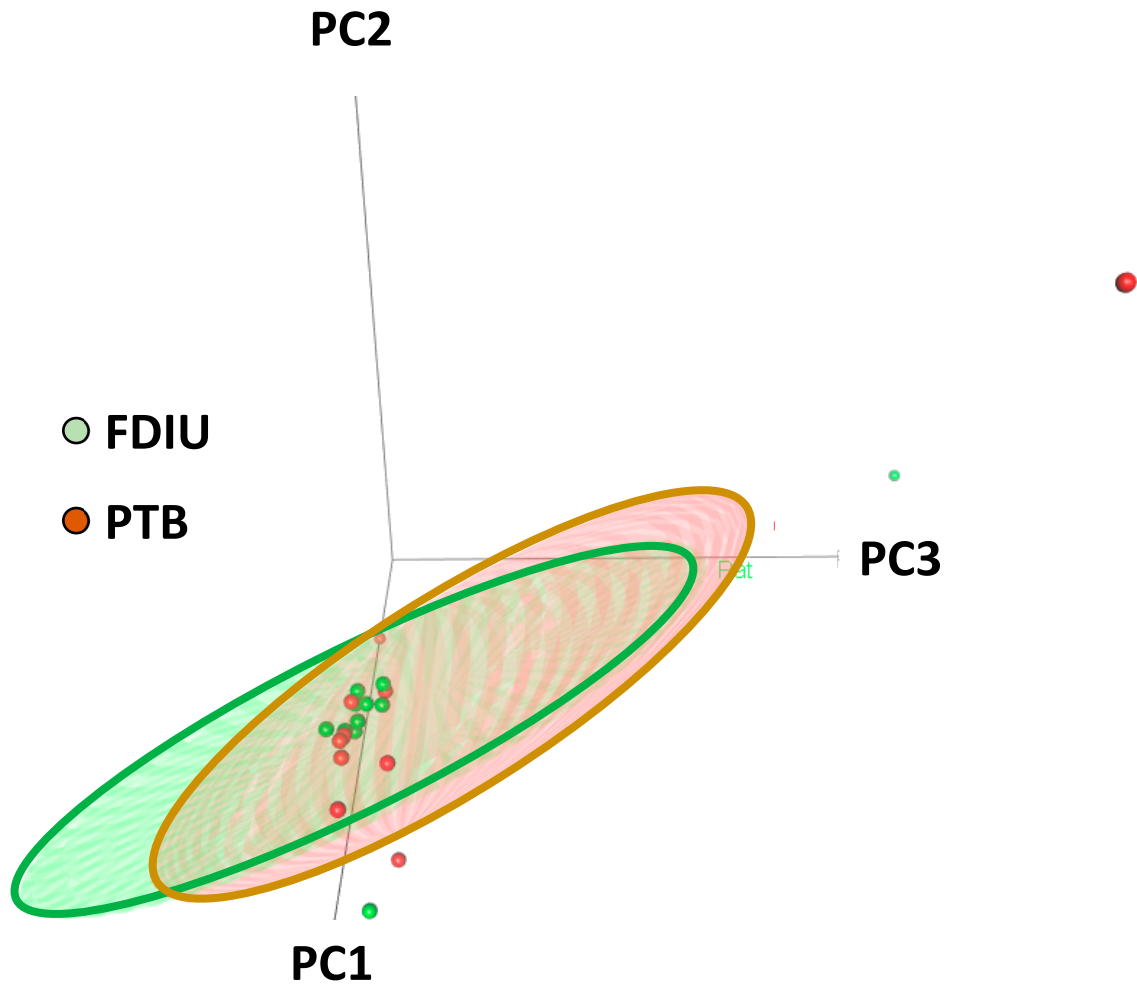

**Figure S1.** Principal Component Analysis of the taxa relative abundances comparing the composition of the vaginal microbiomes of women who delivered stillbirth (green dots) and PTB (brown dots). The ellipsoid contours enclose 50% of the data of each group.

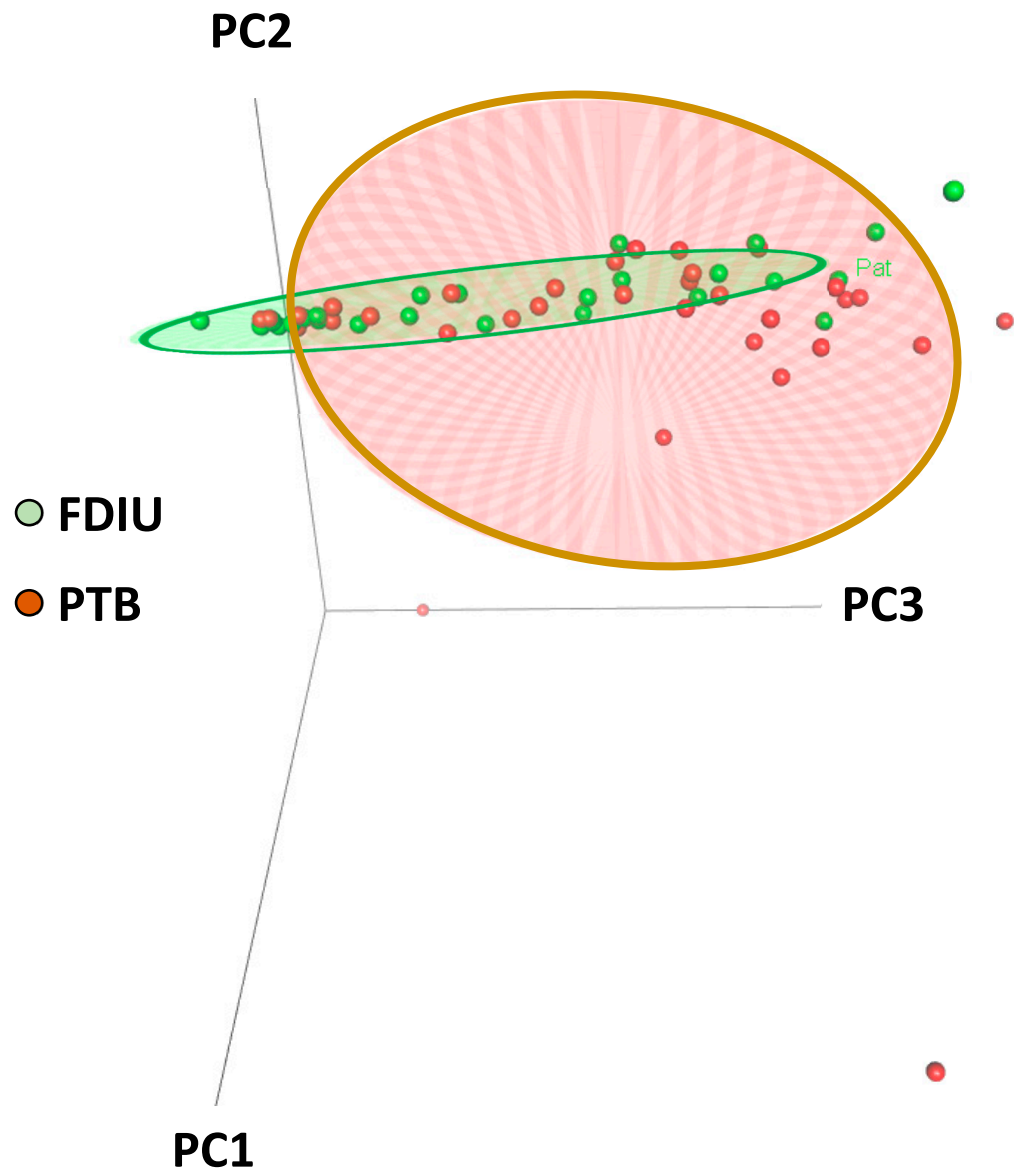

**Figure S2.** Principal Component Analysis of the taxa relative abundances comparing the composition of the amniotic microbiomes of women who delivered stillbirth (green dots) and PTB (brown dots). The ellipsoid contours enclose 50% of the data of each group.
