# Supplementary material for: Insights into the Genital Microbiota of Women Who Experienced Fetal Death in Utero
Source: Microorganisms. 2023 Jul 25;11(8):1877. doi: 10.3390/microorganisms11081877 (PMC10456767; doi:10.3390/microorganisms11081877)
Supplement: Supplementary file 1 [file microorganisms-11-01877-s001.zip › Table S1 Participant Metadata.csv]

Participant	Age	Ethnicity	GA	Visit Reason	Complications	Infections	Microorganisms	Fever	Discharge	Tenderness	Placenta	Bleeding	Child Mov	Child #
CH20150104	22	Mixed Race	26	Prev. Caes. Sec.	HBP	Y	N	Y	N	Y	N	N	<10	1
CH20150110	38	Mixed Race	23	Prev. Caes. Sec.	Apendicitis	Y	N	Y	Y	Y	N	N	´10-20	>3
CH20150114	30	Mixed Race	26	Prev. Caes. Sec.	N	Y	N	Y	Y	Y	N	Y, RED, 1er T	> 20	1
CH20150117	22	Mixed Race	34	Prev. Caes. Sec.	Discharge	N	N	N	Y	Y	N	N	> 20	2
CH20150119	29	Mixed Race	24	Prev. Caes. Sec.	Preeclampsia	N	N	N	Y	Y	N	Y, RED, 24	´10-20	1
CH20150327	19	Mixed Race	28	Prev. Caes. Sec.	Convulsion	N	N	Y	N	N	N	N	<10	1
CH20150430	15	Mixed Race	25	Prev. Caes. Sec.	N	Y	N	N	N	N	N	Y, RED,25	´10-20	1
CH20150432	45	Mixed Race	27	Prev. Caes. Sec.	N	N	N	N	Y	N	N	N	´10-20	1
CH20150442	32	Mixed Race	25	Prev. Caes. Sec.	Abortion Risk	Y	N	Y	Y	Y	N	Y,RED	´10-20	2
CH20150443	38	Mixed Race	28	Prev. Caes. Sec.	N	Y	N	N	N	N	N	N	<10	>3
CH20150450	42	Mixed Race	30	Prev. Caes. Sec.	PPROM	Y	N	N	N	N	N	N	´10-20	3
CH20150113	36	Mixed Race	34	Prev. Caes. Sec.	Mod. Oligohyd.	N	N	N	N	N	N	N	> 20	>3
CH20150115	33	Mixed Race	35	Prev. Caes. Sec.	GDM	N	N	N	Y	Y	N	N	> 20	2
CH20150118	29	Mixed Race	35	Prev. Caes. Sec.	N	N	N	N	N	Y	N	N	<10	1
CH20150108	38	Mixed Race	30	Prev. Caes. Sec.	N	Y	N	N	Y	N	N	Y, BROWN, 28	<10	2
CH20150433	20	Mixed Race	31	Prev. Caes. Sec.	Preeclampsia	N	N	N	N	N	N	N	´10-20	1
CH20150446	21	Mixed Race	33	Prev. Caes. Sec.	N	Y	N	Y	Y	Y	N	N	>20	1
CH20150324	20	Mixed Race	30	Prev. Caes. Sec.	N	Y	N	Y	N	N	N	N	> 20	1
CH20150329	18	Mixed Race	34	Prev. Caes. Sec.	HBP	N	N	N	N	N	N	N	´10-20	1
CH20150434	30	Mixed Race	36	Prev. Caes. Sec.	Abortion Risk	N	N	N	y	N	N	Y, BROWN,34	> 20	2
CH20150437	38	Mixed Race	36	Prev. Caes. Sec.	PPROM	y	N	N	N	N	N	Y, RED	0	>3
CH20150103	38	Mixed Race	35	Prev. Caes. Sec.	N	Y	N	N	Y	N	N	N	> 20	2
